# Supplementary material for: High‐throughput custom capture sequencing identifies novel mutations in coloboma‐associated genes: Mutation in DNA‐binding domain of retinoic acid receptor beta affects nuclear localization causing ocular coloboma
Source: PubMed Central journal article supplement (PMC7027867; doi:10.1002/humu.23954), 2019-12-09
Supplement: HUMU-41-678-s001.pdf [file HUMU-41-678-s001.pdf]

## Supp\_Mat:

### Supp. Figure S1

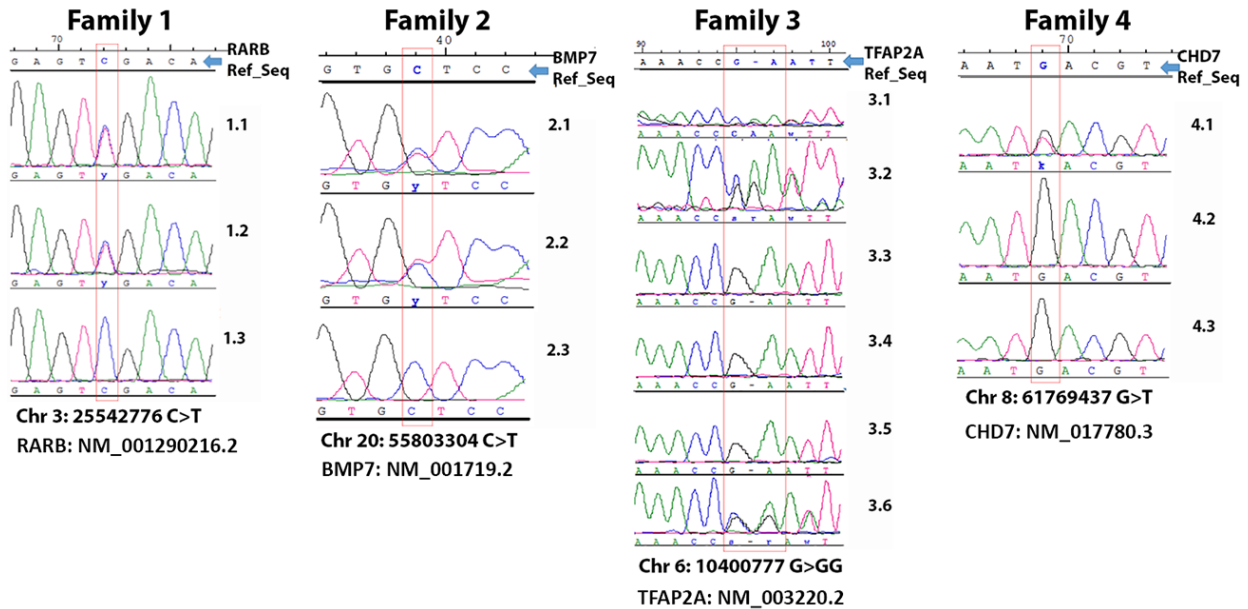

**Supp. Figure S1: Chromatograms reveal segregation of the mutation to the affected individuals.** Family 1: G>A (sequence in reverse direction shown as C>T) heterozygous missense change in *RARB* at Chr3: 25542776 in the male proband (1.1) and the mother (1.2) (NM\_001290216.2, NP\_001277145.1). Family 2: G>A (sequence in reverse direction shown as C>T) heterozygous missense change in *BMP7* at Chr20: 55803304 in the female proband (2.1) and the mother (2.2) (NM\_001719.2, NP\_001710.1). Family 3: G>GG frameshift change in *TFAP2A* at Chr6: 10400777 in the male proband (3.1), his half-sibling (3.6) and the mother (3.2) (NM\_003220.2). Family 4: C>A (sequence in reverse direction shown as G>T) heterozygous nonsense change in *CHD7* at Chr8: 61769437 in the male proband (4.1) (NM\_017780.3, NP\_060250.2).

## Supp. Figure S2

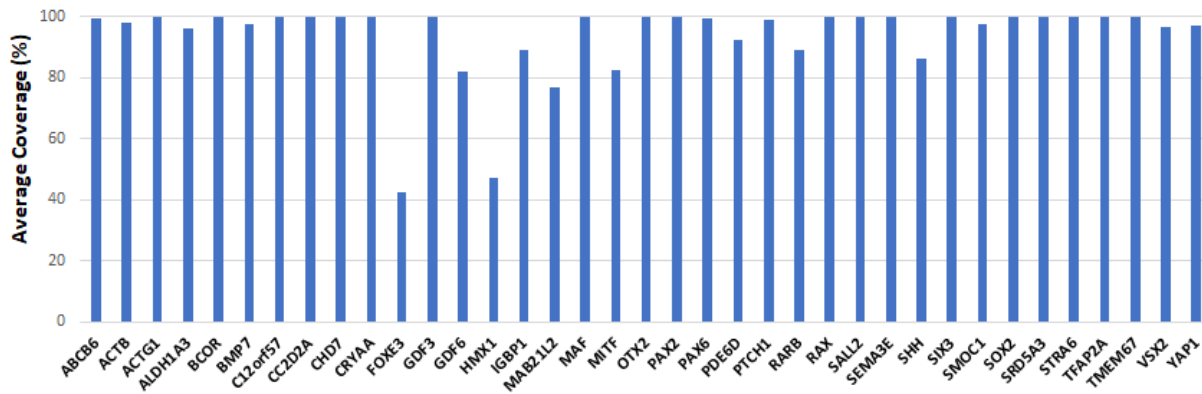

**Supp. Figure S2: Custom capture sequencing of coloboma-associated genes.** Sequencing of the exonic regions reveals about 90% coverage (i.e., sites within the targets that had MPG score greater than 10 and an MPG score to depth of coverage ratio greater than 0.5) in most of the coloboma-associated genes.

### Supp. Figure S3

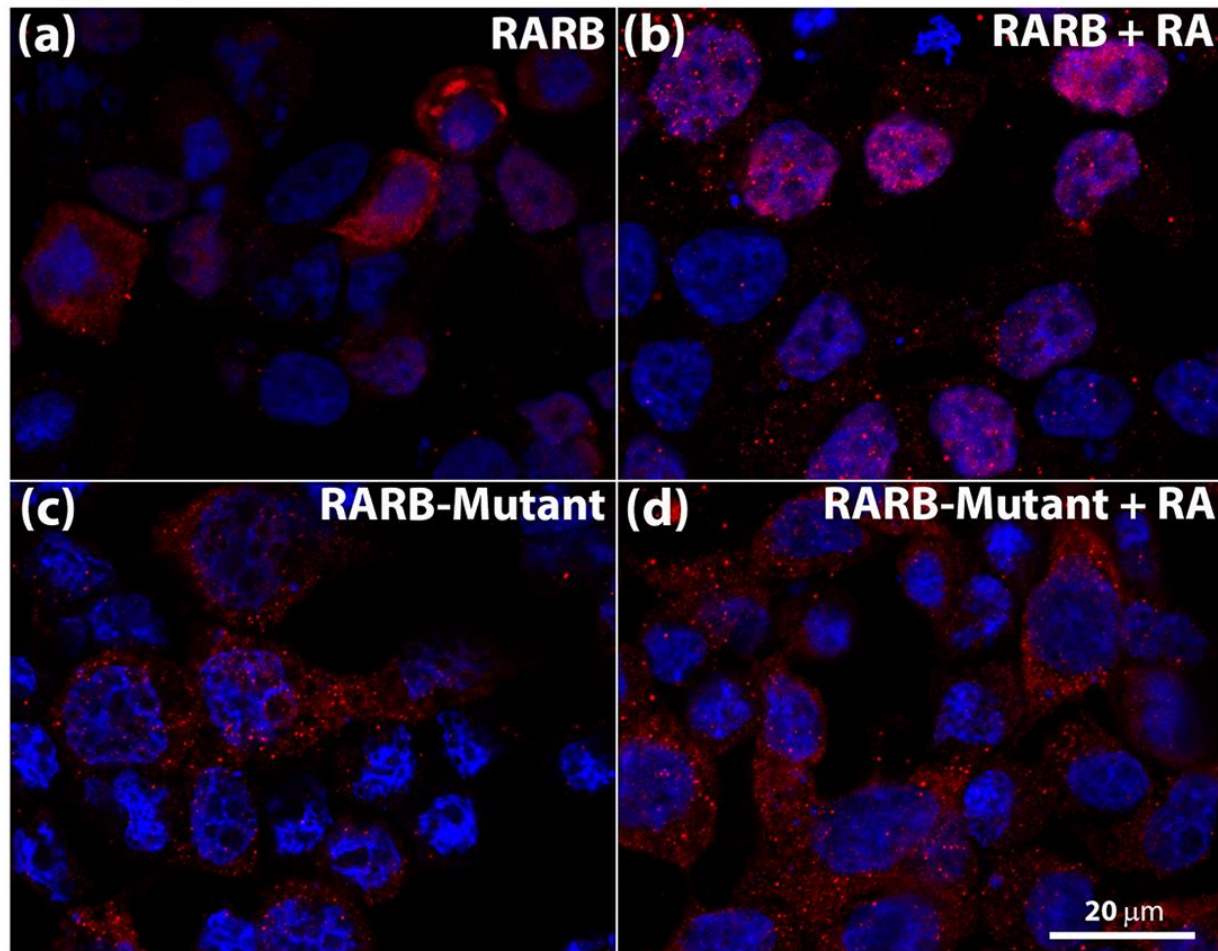

**Supp. Figure S3: Immunofluorescence in HEK 293 cells transfected with wild type *RARB-DYK* or *RARB-mutant-DYK* expression constructs followed by RA treatment. (a, c) Both RARB and RARB-mutant proteins localized to the cytoplasm in the absence of RA. (b, d) Upon treatment with RA, wild type RARB protein localized to the nucleus (b), while RARB-mutant protein was mostly retained in the cytoplasm (d). Scale bar in (d) applies to all panels.**

## Supp. Figure S4

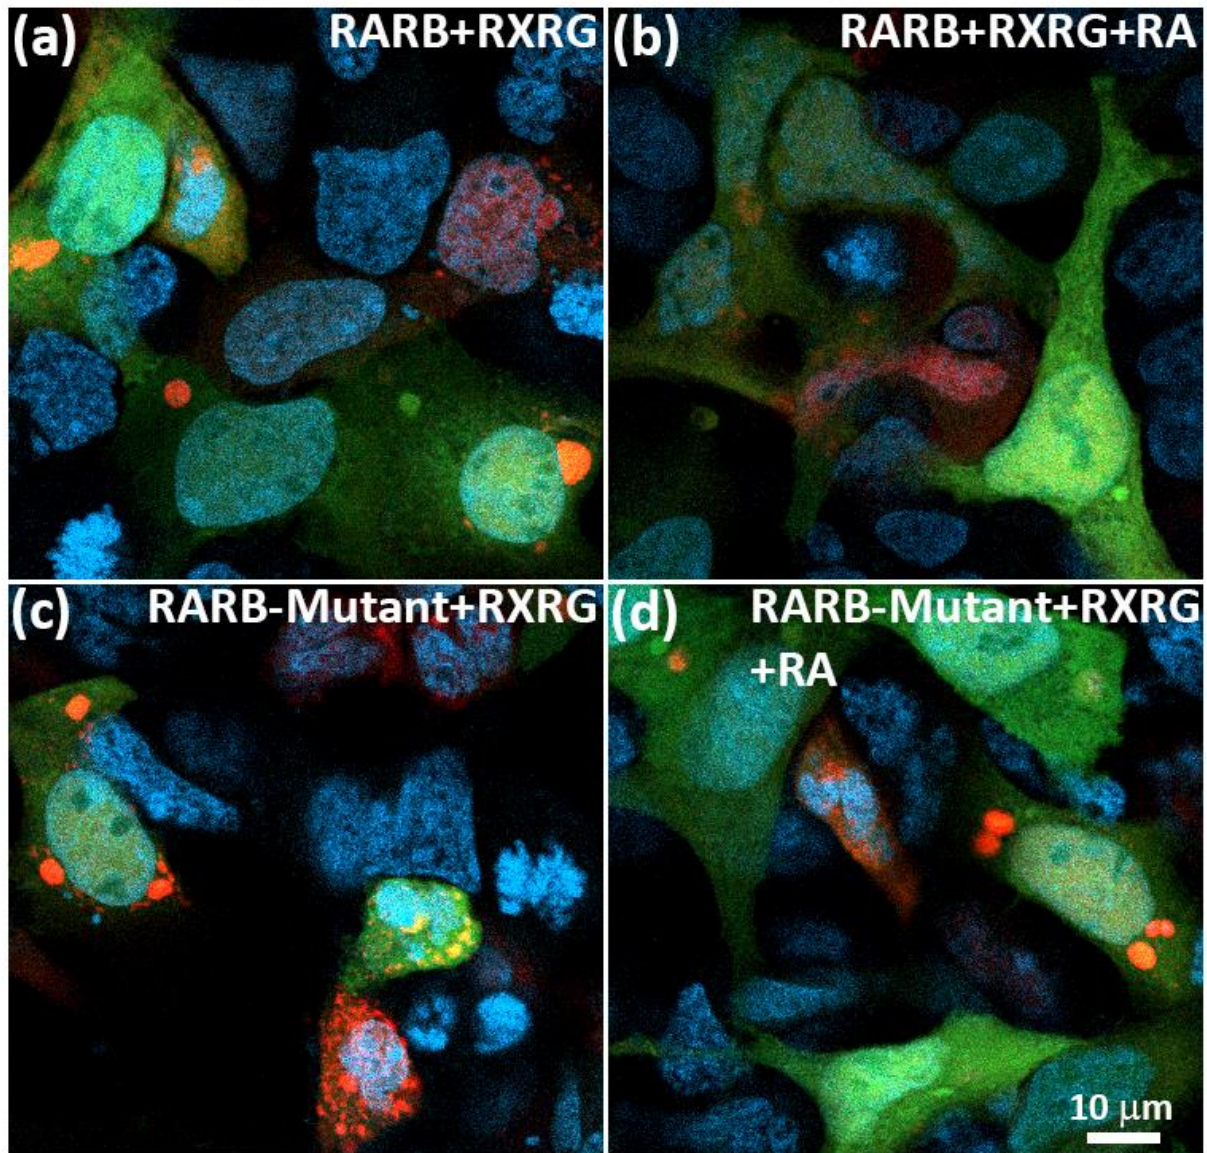

**Supp. Figure S4: Immunofluorescence in HEK 293 cells co-transfected with wild type RARB-GFP or RARB-mutant-GFP and RXRG-RFP expression constructs followed by RA treatment.** (a, c) RARB-GFP and RARB-mutant-GFP along with RXRG-RFP proteins are more localized to the cytoplasm in the absence of RA. (b, d) Upon treatment with RA, no significant difference in the translocation of RXRG-RFP was observed between cells co-transfected with wild type or mutant *RARB-GFP* constructs.

## Supp. Figure S5

(a)

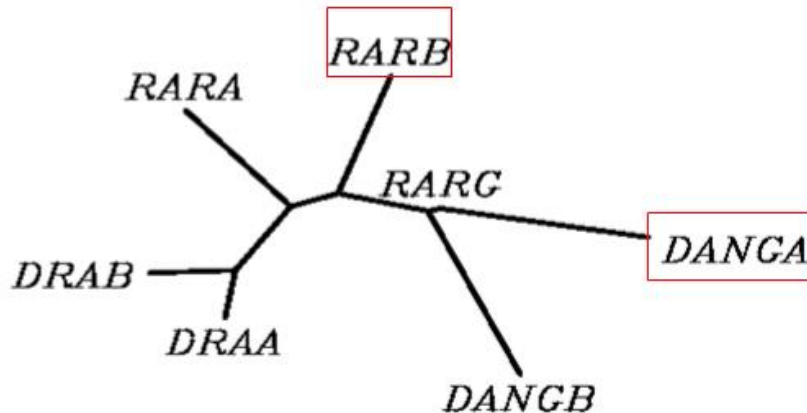

(b)

| Score          | Expect                                                         | Method                       | Identities   | Positives    | Gaps      |
|----------------|----------------------------------------------------------------|------------------------------|--------------|--------------|-----------|
| 629 bits(1623) | 0.0                                                            | Compositional matrix adjust. | 326/415(79%) | 363/415(87%) | 5/415(1%) |
| Query 1        | MFDCMDVLSVSPGQILDIFYTASPSSCMLQEKALKACFSGLTQTEWQHRHTAqqsietqsts |                              |              |              | 60        |
| Sbjct 1        | MFDCM+ L + P Q+ D + +CML++ + ++GL W + +S+ETQSTS                |                              |              |              | 56        |
| Query 61       | seelvpsppspplpppRVYKPCFVCQDKSSGYHYGVSAACEGCKGFFRRSIQKNMIYTCHRD |                              |              |              | 120       |
| Sbjct 57       | SEE+VPS PSP PPRVYKPCFVCQDKSSGYHYGVSA+CEGCKGFFRRSIQKNM+YTCHRD   |                              |              |              | 116       |
| Query 121      | KNCVINKVTRNRCQYRQLQKCFEVMGMSKESVRNDRNKKKETSQECT-ESYEMTAELDD    |                              |              |              | 179       |
| Sbjct 117      | KNC INKVTRNRCQYRQLQKCFEVMGMSKE+VRNDRNKKK+ + ESYE++ EL++        |                              |              |              | 176       |
| Query 180      | LTEKIRKAHQETFPSPCLQGLGKYTTNSSADHRVRLDLGLWDFSELATKCIKIVEFAKRL   |                              |              |              | 239       |
| Sbjct 177      | L K+ KAHQETFPSPCLQGLGKYTTNSS+DHR++LDLGLWDFSEL+TKCIKIVEFAKRL    |                              |              |              | 236       |
| Query 240      | PGFTGLTIADQITLLKAAACLDILILRICTRYTPEQDTMTFSDGLTLNRTQMHNAGFGPLT  |                              |              |              | 299       |
| Sbjct 237      | PGFT LTIADQITLLK+ACLDIL+LRICTRYTPEQDTMTFSDGLTLNRTQMHNAGFGPLT   |                              |              |              | 296       |
| Query 300      | DLVFTFANQLLPLEMDDTETGLLSAICLICGDRQDLEEPTKVDKLOEPLLEALKIYIRKR   |                              |              |              | 359       |
| Sbjct 297      | DLVF FA QLLPLEMDDTETGLLSAICLICGDR DLEEP +VD+LQEPLLEALKIY R+R   |                              |              |              | 356       |
| Query 360      | RPSKPHMFPKILMKITDLRSISAKGAERVITLKMEIPGSMPLIQEMLENSEGHE         |                              |              |              | 414       |
| Sbjct 357      | RP+KPHMFP++LMKITDLR IS KGAER ITLKMEIPG MPPLI+EMLN E E          |                              |              |              | 411       |

**Supp. Figure S5: Zebrafish *rarga* is the closest homolog to the human *RARB* gene.** (a) Phylogenetic analysis of human and zebrafish RA receptor genes revealed zebrafish *rarga* (*DANGA*) as the closest homolog to the human *RARB* gene. *RARA*, *RARB* and *RARG* represent retinoic acid receptors, alpha, beta and gamma respectively. *DRAA* and *DRAB* represent Danio rerio retinoic acid receptor's, alpha-A and alpha-B respectively. *DANGA* and *DANGB* represent Danio rerio retinoic acid receptor's, gamma-A and gamma-B respectively. (b) Identity between human *RARB* and zebrafish *rarga* protein sequences.

**Supp. Table\_S1. (a) List of genes included in custom capture (CC-1 and/or CC-2) high-throughput sequencing**

|    |                        |    |                     |    |                        |     |                     |     |                      |     |                      |
|----|------------------------|----|---------------------|----|------------------------|-----|---------------------|-----|----------------------|-----|----------------------|
| 1  | <i>ABCA5</i>           | 34 | <b><i>CRYAA</i></b> | 67 | <i>GDF5</i>            | 100 | <i>MOBK2C</i>       | 133 | <i>RALDH2</i>        | 166 | <i>TBX22</i>         |
| 2  | <b><i>ABCB6</i></b>    | 35 | <i>CTNND2</i>       | 68 | <b><i>GDF6</i></b>     | 101 | <i>MOBK3</i>        | 134 | <i>RALDH3</i>        | 167 | <i>TEAD1</i>         |
| 3  | <b><i>ACTB</i></b>     | 36 | <i>CYB5A</i>        | 69 | <i>GDF7</i>            | 102 | <i>MRPL13</i>       | 135 | <i>RARA</i>          | 168 | <i>TEAD2</i>         |
| 4  | <b><i>ACTG1</i></b>    | 37 | <i>CYP1B1</i>       | 70 | <i>GREM1</i>           | 103 | <i>MST1</i>         | 136 | <b><i>RARB</i></b>   | 169 | <i>TEAD3</i>         |
| 5  | <i>ADAMTSL4</i>        | 38 | <i>DACT1</i>        | 71 | <i>GREM2</i>           | 104 | <i>MST2</i>         | 137 | <b><i>RAX/RX</i></b> | 170 | <i>TEAD4</i>         |
| 6  | <i>ALDH1A1</i>         | 39 | <i>DAND5</i>        | 72 | <i>HAXA9</i>           | 105 | <i>NCAM1</i>        | 138 | <i>RBP/SUGP1</i>     | 171 | <b><i>TFAP2A</i></b> |
| 7  | <b><i>ALDH1A3</i></b>  | 40 | <i>DCHS1</i>        | 73 | <i>HESX1</i>           | 106 | <i>NET1</i>         | 139 | <i>RBP4</i>          | 172 | <i>TMEM138</i>       |
| 8  | <i>ALDH6A1</i>         | 41 | <i>DCHS2</i>        | 74 | <b><i>HMX1</i></b>     | 107 | <i>NF2</i>          | 140 | <i>RENS1</i>         | 173 | <i>TMEM216</i>       |
| 9  | <i>ALDH7A1</i>         | 42 | <i>DHRS3</i>        | 75 | <b><i>IGBP1</i></b>    | 108 | <i>NKX5-3</i>       | 141 | <i>RORB</i>          | 174 | <b><i>TMEM67</i></b> |
| 10 | <i>ALG3</i>            | 43 | <i>DKK1</i>         | 76 | <i>INPP5E</i>          | 109 | <i>NOL4</i>         | 142 | <i>RPGRIP1L</i>      | 175 | <i>TMX3</i>          |
| 11 | <i>ANAPC1</i>          | 44 | <i>DKK3</i>         | 77 | <i>ITGA5</i>           | 110 | <i>NPHP4</i>        | 143 | <i>RPL38</i>         | 176 | <i>TPTE</i>          |
| 12 | <i>ANK2</i>            | 45 | <i>DLL1</i>         | 78 | <i>JAG1</i>            | 111 | <i>NPHP9</i>        | 144 | <i>RYBP</i>          | 177 | <i>TWSG1</i>         |
| 13 | <i>ATOH7</i>           | 46 | <i>DPYP</i>         | 79 | <i>KIAA0196</i>        | 112 | <i>NR2F1</i>        | 145 | <i>SALL1</i>         | 178 | <i>VAV3</i>          |
| 14 | <i>ATP5G1</i>          | 47 | <i>E2F4</i>         | 80 | <i>KLF12</i>           | 113 | <i>NR2F2</i>        | 146 | <b><i>SALL2</i></b>  | 179 | <i>VAX1</i>          |
| 15 | <b><i>BCOR</i></b>     | 48 | <i>EPHA5</i>        | 81 | <i>LAMA1</i>           | 114 | <i>NR3C1</i>        | 147 | <i>SALL4</i>         | 180 | <i>VAX2</i>          |
| 16 | <i>BMP2</i>            | 49 | <i>EYA1</i>         | 82 | <i>LAMB1</i>           | 115 | <b><i>OTX2</i></b>  | 148 | <i>SCRIB</i>         | 181 | <i>WNT3</i>          |
| 17 | <i>BMP3</i>            | 50 | <i>FADD</i>         | 83 | <i>LAMC1</i>           | 116 | <i>PARP3</i>        | 149 | <b><i>SEMA3E</i></b> | 182 | <i>WNT5A</i>         |
| 18 | <b><i>BMP4</i></b>     | 51 | <i>FAM187B</i>      | 84 | <i>LATS1</i>           | 117 | <b><i>PAX2</i></b>  | 150 | <i>SFRP1</i>         | 183 | <i>WNT5B</i>         |
| 19 | <b><i>BMP7</i></b>     | 52 | <i>FAT1</i>         | 85 | <i>LATS2</i>           | 118 | <b><i>PAX6</i></b>  | 151 | <i>SFRP2</i>         | 184 | <i>WNT8A</i>         |
| 20 | <i>BMPR1B</i>          | 53 | <i>FAT4</i>         | 86 | <i>LHX2</i>            | 119 | <i>PCGF5</i>        | 152 | <i>SFRP5</i>         | 185 | <i>WNT8B</i>         |
| 21 | <b><i>C12orf57</i></b> | 54 | <i>FBXL10</i>       | 87 | <i>LHX5</i>            | 120 | <b><i>PDE6D</i></b> | 153 | <b><i>SHH</i></b>    | 186 | <i>WW45</i>          |
| 22 | <i>C5orf20</i>         | 55 | <i>FDM6</i>         | 88 | <i>LMX1B</i>           | 121 | <i>PDGFA</i>        | 154 | <b><i>SIX3</i></b>   | 187 | <i>WWC1</i>          |
| 23 | <b><i>CC2D2A</i></b>   | 56 | <i>FGF3</i>         | 89 | <i>LRP6</i>            | 122 | <i>PDGFD</i>        | 155 | <i>SKI</i>           | 188 | <b><i>YAP1</i></b>   |
| 24 | <i>CDH2</i>            | 57 | <i>FGF8</i>         | 90 | <b><i>MAB21IL2</i></b> | 123 | <i>PHACTR4</i>      | 156 | <i>SLC16A4</i>       | 189 | <i>ZFP503 (NLZ2)</i> |
| 25 | <i>CDH4</i>            | 58 | <i>FLG2</i>         | 91 | <b><i>MAF</i></b>      | 124 | <i>PHB1</i>         | 157 | <i>SLC38A8</i>       | 190 | <i>ZFP703 (NLZ1)</i> |
| 26 | <i>CEP290</i>          | 59 | <i>FOXD1</i>        | 92 | <i>MATH5</i>           | 125 | <i>PHB2</i>         | 158 | <b><i>SMOC1</i></b>  | 191 | <i>ZIC1</i>          |
| 27 | <i>CER1</i>            | 60 | <b><i>FOXE3</i></b> | 93 | <i>MEIS1</i>           | 126 | <i>PIGL</i>         | 159 | <i>SOX11</i>         | 192 | <i>ZIC2</i>          |
| 28 | <b><i>CHD7</i></b>     | 61 | <i>FOXP1</i>        | 94 | <i>MEIS2</i>           | 127 | <i>PKP2</i>         | 160 | <b><i>SOX2</i></b>   | 193 | <i>ZIC4</i>          |
| 29 | <i>CHORDIN</i>         | 62 | <i>FREM1</i>        | 95 | <b><i>MITF</i></b>     | 128 | <i>PORCN</i>        | 161 | <i>SOX6</i>          |     |                      |
| 30 | <i>CHRD1</i>           | 63 | <i>FZ5</i>          | 96 | <i>MKS3</i>            | 129 | <i>POU4F2</i>       | 162 | <i>SPECC1L</i>       |     |                      |
| 31 | <b><i>CHX10</i></b>    | 64 | <i>FZ8</i>          | 97 | <i>MOBK1A</i>          | 130 | <b><i>PTCH1</i></b> | 163 | <b><i>SRD5A3</i></b> |     |                      |
| 32 | <i>CLDN19</i>          | 65 | <i>GDF11</i>        | 98 | <i>MOBK1B</i>          | 131 | <i>PUF60</i>        | 164 | <b><i>STRA6</i></b>  |     |                      |
| 33 | <i>CPN2</i>            | 66 | <b><i>GDF3</i></b>  | 99 | <i>MOBK2a</i>          | 132 | <i>RALDH1</i>       | 165 | <i>TAZ</i>           |     |                      |

**Genes in bold are human coloboma-associated genes.**

**(b) Exon-wise coverage for each coloboma-associated gene included in the sequencing panel**

| <b>Gene</b> | <b>Chromosome</b> | <b>Start</b> | <b>End</b> | <b>Base Pairs</b> | <b>Average</b> | <b>Min</b> | <b>Max</b> |
|-------------|-------------------|--------------|------------|-------------------|----------------|------------|------------|
| ABCB6       | chr2              | 220074659    | 220074770  | 111               | 100            | 100        | 100        |
| ABCB6       | chr2              | 220074949    | 220075022  | 73                | 100            | 100        | 100        |
| ABCB6       | chr2              | 220075100    | 220075199  | 99                | 100            | 100        | 100        |
| ABCB6       | chr2              | 220075430    | 220075547  | 117               | 100            | 100        | 100        |
| ABCB6       | chr2              | 220075653    | 220075832  | 179               | 100            | 100        | 100        |
| ABCB6       | chr2              | 220077106    | 220077215  | 109               | 100            | 100        | 100        |
| ABCB6       | chr2              | 220077727    | 220077789  | 62                | 100            | 100        | 100        |
| ABCB6       | chr2              | 220077960    | 220078050  | 90                | 100            | 100        | 100        |
| ABCB6       | chr2              | 220078158    | 220078226  | 68                | 100            | 100        | 100        |
| ABCB6       | chr2              | 220078309    | 220078390  | 81                | 100            | 100        | 100        |
| ABCB6       | chr2              | 220078545    | 220078675  | 130               | 100            | 100        | 100        |
| ABCB6       | chr2              | 220078840    | 220078910  | 70                | 100            | 100        | 100        |
| ABCB6       | chr2              | 220079108    | 220079222  | 114               | 100            | 100        | 100        |
| ABCB6       | chr2              | 220079680    | 220079806  | 126               | 100            | 100        | 100        |
| ABCB6       | chr2              | 220080716    | 220080904  | 188               | 100            | 99         | 100        |
| ABCB6       | chr2              | 220081083    | 220081189  | 106               | 100            | 100        | 100        |
| ABCB6       | chr2              | 220081371    | 220081556  | 185               | 100            | 100        | 100        |
| ABCB6       | chr2              | 220082389    | 220082531  | 142               | 100            | 100        | 100        |
| ABCB6       | chr2              | 220082844    | 220083395  | 551               | 97             | 48         | 100        |
| ACTB        | chr7              | 5567378      | 5567524    | 146               | 100            | 100        | 100        |
| ACTB        | chr7              | 5567632      | 5567818    | 186               | 100            | 100        | 100        |
| ACTB        | chr7              | 5567909      | 5568352    | 443               | 100            | 100        | 100        |
| ACTB        | chr7              | 5568789      | 5569033    | 244               | 100            | 100        | 100        |
| ACTB        | chr7              | 5569163      | 5569288    | 125               | 81             | 0          | 100        |
| ACTB        | chr7              | 5569294      | 5569296    | 2                 | 81             | 0          | 100        |
| ACTB        | chr7              | 5570152      | 5570154    | 2                 | 21             | 0          | 100        |
| ACTG1       | chr17             | 79477715     | 79477861   | 146               | 100            | 100        | 100        |
| ACTG1       | chr17             | 79477950     | 79478136   | 186               | 100            | 100        | 100        |
| ACTG1       | chr17             | 79478211     | 79478654   | 443               | 100            | 100        | 100        |
| ACTG1       | chr17             | 79478926     | 79479170   | 244               | 100            | 100        | 100        |
| ACTG1       | chr17             | 79479255     | 79479380   | 125               | 100            | 99         | 100        |
| ACTG1       | chr17             | 79479386     | 79479388   | 2                 | 100            | 100        | 100        |
| ACTG1       | chr17             | 79479638     | 79479640   | 2                 | 52             | 0          | 100        |
| ACTG1       | chr17             | 79479757     | 79479759   | 2                 | 31             | 0          | 100        |
| ALDH1A3     | chr15             | 101420112    | 101420213  | 101               | 40             | 0          | 100        |
| ALDH1A3     | chr15             | 101425469    | 101425578  | 109               | 100            | 100        | 100        |
| ALDH1A3     | chr15             | 101427774    | 101427919  | 145               | 100            | 99         | 100        |

|          |       |           |           |      |     |     |     |
|----------|-------|-----------|-----------|------|-----|-----|-----|
| ALDH1A3  | chr15 | 101432712 | 101432846 | 134  | 100 | 100 | 100 |
| ALDH1A3  | chr15 | 101433147 | 101433213 | 66   | 100 | 100 | 100 |
| ALDH1A3  | chr15 | 101434156 | 101434289 | 133  | 100 | 100 | 100 |
| ALDH1A3  | chr15 | 101436135 | 101436253 | 118  | 100 | 100 | 100 |
| ALDH1A3  | chr15 | 101438285 | 101438392 | 107  | 100 | 100 | 100 |
| ALDH1A3  | chr15 | 101440777 | 101440966 | 189  | 100 | 100 | 100 |
| ALDH1A3  | chr15 | 101445725 | 101445894 | 169  | 100 | 100 | 100 |
| ALDH1A3  | chr15 | 101447323 | 101447485 | 162  | 100 | 100 | 100 |
| ALDH1A3  | chr15 | 101448610 | 101448689 | 79   | 100 | 100 | 100 |
| ALDH1A3  | chr15 | 101454903 | 101454978 | 75   | 100 | 100 | 100 |
| BCOR     | chrX  | 39911361  | 39911655  | 294  | 100 | 100 | 100 |
| BCOR     | chrX  | 39913136  | 39913297  | 161  | 100 | 100 | 100 |
| BCOR     | chrX  | 39913506  | 39913588  | 82   | 100 | 100 | 100 |
| BCOR     | chrX  | 39914618  | 39914768  | 150  | 100 | 100 | 100 |
| BCOR     | chrX  | 39916405  | 39916576  | 171  | 100 | 100 | 100 |
| BCOR     | chrX  | 39921389  | 39921648  | 259  | 100 | 100 | 100 |
| BCOR     | chrX  | 39921996  | 39922326  | 330  | 100 | 100 | 100 |
| BCOR     | chrX  | 39922858  | 39923207  | 349  | 100 | 100 | 100 |
| BCOR     | chrX  | 39923586  | 39923854  | 268  | 100 | 100 | 100 |
| BCOR     | chrX  | 39930223  | 39930414  | 191  | 100 | 100 | 100 |
| BCOR     | chrX  | 39930887  | 39930945  | 58   | 100 | 100 | 100 |
| BCOR     | chrX  | 39931599  | 39934435  | 2836 | 100 | 100 | 100 |
| BCOR     | chrX  | 39935704  | 39935787  | 83   | 100 | 100 | 100 |
| BCOR     | chrX  | 39937094  | 39937182  | 88   | 100 | 100 | 100 |
| BCOR     | chrX  | 39937222  | 39937224  | 2    | 100 | 100 | 100 |
| BCOR     | chrX  | 39956465  | 39956467  | 2    | 100 | 50  | 100 |
| BCOR     | chrX  | 40036257  | 40036259  | 2    | 100 | 100 | 100 |
| BMP7     | chr20 | 55746014  | 55746166  | 152  | 100 | 100 | 100 |
| BMP7     | chr20 | 55748253  | 55748368  | 115  | 100 | 100 | 100 |
| BMP7     | chr20 | 55749984  | 55750065  | 81   | 100 | 100 | 100 |
| BMP7     | chr20 | 55758775  | 55758977  | 202  | 100 | 100 | 100 |
| BMP7     | chr20 | 55777528  | 55777681  | 153  | 100 | 100 | 100 |
| BMP7     | chr20 | 55803282  | 55803479  | 197  | 100 | 100 | 100 |
| BMP7     | chr20 | 55840758  | 55841178  | 420  | 91  | 49  | 100 |
| C12orf57 | chr12 | 7052812   | 7052827   | 15   | 99  | 0   | 100 |
| C12orf57 | chr12 | 7053267   | 7053269   | 2    | 100 | 100 | 100 |
| C12orf57 | chr12 | 7053284   | 7053338   | 54   | 100 | 100 | 100 |
| C12orf57 | chr12 | 7053540   | 7053542   | 2    | 100 | 100 | 100 |
| C12orf57 | chr12 | 7053636   | 7053817   | 181  | 100 | 100 | 100 |
| C12orf57 | chr12 | 7054931   | 7055085   | 154  | 100 | 100 | 100 |
| CC2D2A   | chr4  | 15471681  | 15471683  | 2    | 100 | 100 | 100 |



|        |      |          |          |     |     |     |     |
|--------|------|----------|----------|-----|-----|-----|-----|
| CC2D2A | chr4 | 15474843 | 15474845 | 2   | 100 | 100 | 100 |
| CC2D2A | chr4 | 15474879 | 15474881 | 2   | 100 | 100 | 100 |
| CC2D2A | chr4 | 15477536 | 15477538 | 2   | 100 | 100 | 100 |
| CC2D2A | chr4 | 15477556 | 15477597 | 41  | 100 | 100 | 100 |
| CC2D2A | chr4 | 15480344 | 15480432 | 88  | 100 | 100 | 100 |
| CC2D2A | chr4 | 15480844 | 15480954 | 110 | 100 | 100 | 100 |
| CC2D2A | chr4 | 15482325 | 15482453 | 128 | 100 | 100 | 100 |
| CC2D2A | chr4 | 15482818 | 15482909 | 91  | 97  | 0   | 100 |
| CC2D2A | chr4 | 15504049 | 15504142 | 93  | 100 | 99  | 100 |
| CC2D2A | chr4 | 15504442 | 15504548 | 106 | 100 | 100 | 100 |
| CC2D2A | chr4 | 15511759 | 15511865 | 106 | 100 | 100 | 100 |
| CC2D2A | chr4 | 15512867 | 15513048 | 181 | 100 | 100 | 100 |
| CC2D2A | chr4 | 15516327 | 15516494 | 167 | 100 | 100 | 100 |
| CC2D2A | chr4 | 15517488 | 15517629 | 141 | 100 | 100 | 100 |
| CC2D2A | chr4 | 15518245 | 15518381 | 136 | 100 | 100 | 100 |
| CC2D2A | chr4 | 15529067 | 15529281 | 214 | 100 | 100 | 100 |
| CC2D2A | chr4 | 15530240 | 15530351 | 111 | 100 | 100 | 100 |
| CC2D2A | chr4 | 15534813 | 15534958 | 145 | 100 | 97  | 100 |
| CC2D2A | chr4 | 15538540 | 15538701 | 161 | 100 | 100 | 100 |
| CC2D2A | chr4 | 15539519 | 15539762 | 243 | 100 | 100 | 100 |
| CC2D2A | chr4 | 15542457 | 15542639 | 182 | 100 | 100 | 100 |
| CC2D2A | chr4 | 15552444 | 15552605 | 161 | 100 | 100 | 100 |
| CC2D2A | chr4 | 15554778 | 15554930 | 152 | 100 | 99  | 100 |
| CC2D2A | chr4 | 15556692 | 15556835 | 143 | 100 | 100 | 100 |
| CC2D2A | chr4 | 15558924 | 15559132 | 208 | 100 | 100 | 100 |
| CC2D2A | chr4 | 15560785 | 15560882 | 97  | 100 | 100 | 100 |
| CC2D2A | chr4 | 15562151 | 15562247 | 96  | 100 | 100 | 100 |
| CC2D2A | chr4 | 15564975 | 15565147 | 172 | 100 | 100 | 100 |
| CC2D2A | chr4 | 15568997 | 15569107 | 110 | 100 | 100 | 100 |
| CC2D2A | chr4 | 15569297 | 15569411 | 114 | 100 | 100 | 100 |
| CC2D2A | chr4 | 15570913 | 15571014 | 101 | 100 | 100 | 100 |
| CC2D2A | chr4 | 15572018 | 15572121 | 103 | 100 | 100 | 100 |
| CC2D2A | chr4 | 15575770 | 15575951 | 181 | 100 | 100 | 100 |
| CC2D2A | chr4 | 15581588 | 15581796 | 208 | 100 | 100 | 100 |
| CC2D2A | chr4 | 15587777 | 15587871 | 94  | 100 | 100 | 100 |
| CC2D2A | chr4 | 15589436 | 15589554 | 118 | 100 | 100 | 100 |
| CC2D2A | chr4 | 15591165 | 15591304 | 139 | 100 | 98  | 100 |
| CC2D2A | chr4 | 15597705 | 15597832 | 127 | 100 | 99  | 100 |
| CC2D2A | chr4 | 15599027 | 15599090 | 63  | 100 | 100 | 100 |
| CC2D2A | chr4 | 15601149 | 15601331 | 182 | 100 | 100 | 100 |
| CC2D2A | chr4 | 15602857 | 15603048 | 191 | 100 | 100 | 100 |

|       |       |          |          |      |     |     |     |
|-------|-------|----------|----------|------|-----|-----|-----|
| CHD7  | chr8  | 61591641 | 61591643 | 2    | 81  | 0   | 100 |
| CHD7  | chr8  | 61653815 | 61653817 | 2    | 100 | 100 | 100 |
| CHD7  | chr8  | 61653991 | 61655658 | 1667 | 100 | 100 | 100 |
| CHD7  | chr8  | 61693556 | 61693991 | 435  | 100 | 100 | 100 |
| CHD7  | chr8  | 61707542 | 61707688 | 146  | 100 | 100 | 100 |
| CHD7  | chr8  | 61712944 | 61713086 | 142  | 100 | 100 | 100 |
| CHD7  | chr8  | 61714084 | 61714154 | 70   | 100 | 100 | 100 |
| CHD7  | chr8  | 61720773 | 61720833 | 60   | 100 | 100 | 100 |
| CHD7  | chr8  | 61728943 | 61729062 | 119  | 100 | 99  | 100 |
| CHD7  | chr8  | 61732563 | 61732651 | 88   | 100 | 100 | 100 |
| CHD7  | chr8  | 61734346 | 61734488 | 142  | 100 | 100 | 100 |
| CHD7  | chr8  | 61734580 | 61734706 | 126  | 100 | 100 | 100 |
| CHD7  | chr8  | 61735059 | 61735307 | 248  | 100 | 99  | 100 |
| CHD7  | chr8  | 61736396 | 61736577 | 181  | 100 | 90  | 100 |
| CHD7  | chr8  | 61741219 | 61741367 | 148  | 100 | 100 | 100 |
| CHD7  | chr8  | 61742878 | 61743138 | 260  | 100 | 100 | 100 |
| CHD7  | chr8  | 61748629 | 61748844 | 215  | 100 | 100 | 100 |
| CHD7  | chr8  | 61749373 | 61749573 | 200  | 100 | 100 | 100 |
| CHD7  | chr8  | 61750224 | 61750396 | 172  | 100 | 100 | 100 |
| CHD7  | chr8  | 61750632 | 61750816 | 184  | 100 | 100 | 100 |
| CHD7  | chr8  | 61754200 | 61754315 | 115  | 100 | 100 | 100 |
| CHD7  | chr8  | 61754403 | 61754613 | 210  | 100 | 100 | 100 |
| CHD7  | chr8  | 61757420 | 61757624 | 204  | 100 | 100 | 100 |
| CHD7  | chr8  | 61757806 | 61757970 | 164  | 100 | 99  | 100 |
| CHD7  | chr8  | 61761071 | 61761165 | 94   | 100 | 100 | 100 |
| CHD7  | chr8  | 61761607 | 61761715 | 108  | 100 | 100 | 100 |
| CHD7  | chr8  | 61763049 | 61763183 | 134  | 100 | 100 | 100 |
| CHD7  | chr8  | 61763588 | 61763665 | 77   | 100 | 100 | 100 |
| CHD7  | chr8  | 61763818 | 61763880 | 62   | 100 | 100 | 100 |
| CHD7  | chr8  | 61764575 | 61764808 | 233  | 100 | 100 | 100 |
| CHD7  | chr8  | 61765054 | 61765267 | 213  | 100 | 100 | 100 |
| CHD7  | chr8  | 61765385 | 61766061 | 676  | 100 | 100 | 100 |
| CHD7  | chr8  | 61766919 | 61767084 | 165  | 100 | 100 | 100 |
| CHD7  | chr8  | 61768531 | 61768763 | 232  | 100 | 100 | 100 |
| CHD7  | chr8  | 61769001 | 61769449 | 448  | 100 | 100 | 100 |
| CHD7  | chr8  | 61773460 | 61773686 | 226  | 100 | 100 | 100 |
| CHD7  | chr8  | 61774752 | 61774897 | 145  | 100 | 100 | 100 |
| CHD7  | chr8  | 61775104 | 61775213 | 109  | 100 | 100 | 100 |
| CHD7  | chr8  | 61777572 | 61778492 | 920  | 100 | 100 | 100 |
| CRYAA | chr21 | 44589209 | 44589400 | 191  | 100 | 100 | 100 |
| CRYAA | chr21 | 44590624 | 44590751 | 127  | 100 | 100 | 100 |

|         |       |           |           |      |     |     |     |
|---------|-------|-----------|-----------|------|-----|-----|-----|
| CRYAA   | chr21 | 44592178  | 44592390  | 212  | 100 | 99  | 100 |
| FOXE3   | chr1  | 47881985  | 47882949  | 964  | 43  | 0   | 100 |
| GDF3    | chr12 | 7842473   | 7843302   | 829  | 100 | 100 | 100 |
| GDF3    | chr12 | 7848054   | 7848324   | 270  | 100 | 100 | 100 |
| GDF6    | chr8  | 97156790  | 97157754  | 964  | 76  | 49  | 100 |
| GDF6    | chr8  | 97172512  | 97172920  | 408  | 97  | 64  | 100 |
| HMX1    | chr4  | 8847871   | 8848052   | 181  | 0   | 0   | 0   |
| HMX1    | chr4  | 8869418   | 8870073   | 655  | 65  | 5   | 100 |
| HMX1    | chr4  | 8872944   | 8873340   | 396  | 39  | 0   | 100 |
| IGBP1   | chrX  | 69353390  | 69353392  | 2    | 100 | 100 | 100 |
| IGBP1   | chrX  | 69353570  | 69353572  | 2    | 100 | 100 | 100 |
| IGBP1   | chrX  | 69353797  | 69353987  | 190  | 100 | 100 | 100 |
| IGBP1   | chrX  | 69354370  | 69354668  | 298  | 100 | 100 | 100 |
| IGBP1   | chrX  | 69366480  | 69366680  | 200  | 100 | 100 | 100 |
| IGBP1   | chrX  | 69368608  | 69368692  | 84   | 100 | 100 | 100 |
| IGBP1   | chrX  | 69370057  | 69370174  | 117  | 100 | 100 | 100 |
| IGBP1   | chrX  | 69385680  | 69385831  | 151  | 100 | 100 | 100 |
| MAB21L2 | chr4  | 151504179 | 151505263 | 1084 | 100 | 100 | 100 |
| MAF     | chr16 | 79628356  | 79628452  | 96   | 100 | 100 | 100 |
| MAF     | chr16 | 79632675  | 79633801  | 1126 | 75  | 50  | 100 |
| MITF    | chr3  | 69788748  | 69788854  | 106  | 100 | 100 | 100 |
| MITF    | chr3  | 69812843  | 69812845  | 2    | 100 | 100 | 100 |
| MITF    | chr3  | 69812992  | 69813095  | 103  | 100 | 100 | 100 |
| MITF    | chr3  | 69915441  | 69915499  | 58   | 100 | 100 | 100 |
| MITF    | chr3  | 69928282  | 69928536  | 254  | 100 | 100 | 100 |
| MITF    | chr3  | 69985873  | 69985908  | 35   | 100 | 100 | 100 |
| MITF    | chr3  | 69986970  | 69987202  | 232  | 100 | 100 | 100 |
| MITF    | chr3  | 69987500  | 69987517  | 17   | 100 | 100 | 100 |
| MITF    | chr3  | 69988246  | 69988334  | 88   | 100 | 100 | 100 |
| MITF    | chr3  | 69990384  | 69990484  | 100  | 100 | 100 | 100 |
| MITF    | chr3  | 69998199  | 69998321  | 122  | 100 | 100 | 100 |
| MITF    | chr3  | 70000960  | 70001039  | 79   | 100 | 99  | 100 |
| MITF    | chr3  | 70005603  | 70005683  | 80   | 100 | 100 | 100 |
| MITF    | chr3  | 70008421  | 70008573  | 152  | 100 | 100 | 100 |
| MITF    | chr3  | 70013995  | 70014399  | 404  | 100 | 100 | 100 |
| OTX2    | chr14 | 57268452  | 57269075  | 623  | 100 | 100 | 100 |
| OTX2    | chr14 | 57270903  | 57271083  | 180  | 100 | 100 | 100 |
| OTX2    | chr14 | 57272075  | 57272174  | 99   | 100 | 100 | 100 |
| OTX2    | chr14 | 57272293  | 57272295  | 2    | 100 | 100 | 100 |
| OTX2    | chr14 | 57276874  | 57276876  | 2    | 100 | 100 | 100 |
| OTX2    | chr14 | 57276940  | 57276942  | 2    | 100 | 100 | 100 |

|       |       |           |           |     |     |     |     |
|-------|-------|-----------|-----------|-----|-----|-----|-----|
| OTX2  | chr14 | 57277091  | 57277093  | 2   | 100 | 100 | 100 |
| PAX2  | chr10 | 102495465 | 102495492 | 27  | 0   | 0   | 0   |
| PAX2  | chr10 | 102505947 | 102506062 | 115 | 96  | 3   | 100 |
| PAX2  | chr10 | 102509500 | 102509673 | 173 | 100 | 47  | 100 |
| PAX2  | chr10 | 102510448 | 102510650 | 202 | 100 | 100 | 100 |
| PAX2  | chr10 | 102539252 | 102539342 | 90  | 100 | 100 | 100 |
| PAX2  | chr10 | 102541000 | 102541124 | 124 | 100 | 100 | 100 |
| PAX2  | chr10 | 102546697 | 102546770 | 73  | 100 | 100 | 100 |
| PAX2  | chr10 | 102566184 | 102566364 | 180 | 100 | 100 | 100 |
| PAX2  | chr10 | 102568864 | 102568995 | 131 | 100 | 99  | 100 |
| PAX2  | chr10 | 102584402 | 102584508 | 106 | 100 | 100 | 100 |
| PAX2  | chr10 | 102584656 | 102584743 | 87  | 100 | 100 | 100 |
| PAX2  | chr10 | 102586763 | 102586854 | 91  | 93  | 0   | 100 |
| PAX2  | chr10 | 102587297 | 102587440 | 143 | 100 | 99  | 100 |
| PAX6  | chr11 | 31811481  | 31811569  | 88  | 100 | 99  | 100 |
| PAX6  | chr11 | 31812255  | 31812410  | 155 | 100 | 100 | 100 |
| PAX6  | chr11 | 31814811  | 31815103  | 292 | 100 | 100 | 100 |
| PAX6  | chr11 | 31815197  | 31815352  | 155 | 100 | 100 | 100 |
| PAX6  | chr11 | 31815577  | 31815664  | 87  | 100 | 100 | 100 |
| PAX6  | chr11 | 31816175  | 31816338  | 163 | 100 | 100 | 100 |
| PAX6  | chr11 | 31822236  | 31822406  | 170 | 100 | 100 | 100 |
| PAX6  | chr11 | 31822775  | 31822777  | 2   | 99  | 0   | 100 |
| PAX6  | chr11 | 31823106  | 31823326  | 220 | 100 | 100 | 100 |
| PAX6  | chr11 | 31823416  | 31823462  | 46  | 100 | 100 | 100 |
| PAX6  | chr11 | 31824249  | 31824384  | 135 | 100 | 100 | 100 |
| PAX6  | chr11 | 31825497  | 31825499  | 2   | 0   | 0   | 0   |
| PAX6  | chr11 | 31827947  | 31827959  | 12  | 100 | 100 | 100 |
| PAX6  | chr11 | 31828010  | 31828012  | 2   | 100 | 100 | 100 |
| PAX6  | chr11 | 31828394  | 31828396  | 2   | 100 | 100 | 100 |
| PAX6  | chr11 | 31828473  | 31828475  | 2   | 100 | 100 | 100 |
| PAX6  | chr11 | 31832373  | 31832375  | 2   | 100 | 100 | 100 |
| PAX6  | chr11 | 31832563  | 31832565  | 2   | 100 | 100 | 100 |
| PAX6  | chr11 | 31832660  | 31832662  | 2   | 100 | 100 | 100 |
| PAX6  | chr11 | 31832758  | 31832760  | 2   | 100 | 100 | 100 |
| PAX6  | chr11 | 31833638  | 31833640  | 2   | 100 | 100 | 100 |
| PAX6  | chr11 | 31833694  | 31833696  | 2   | 100 | 100 | 100 |
| PAX6  | chr11 | 31839354  | 31839356  | 2   | 98  | 0   | 100 |
| PDE6D | chr2  | 232597661 | 232597745 | 84  | 100 | 100 | 100 |
| PDE6D | chr2  | 232601894 | 232602004 | 110 | 100 | 100 | 100 |
| PDE6D | chr2  | 232602720 | 232602850 | 130 | 100 | 100 | 100 |
| PDE6D | chr2  | 232603807 | 232603900 | 93  | 100 | 100 | 100 |

|       |      |           |           |     |     |     |     |
|-------|------|-----------|-----------|-----|-----|-----|-----|
| PDE6D | chr2 | 232645772 | 232645824 | 52  | 81  | 0   | 100 |
| PTCH1 | chr9 | 98208673  | 98208675  | 2   | 100 | 100 | 100 |
| PTCH1 | chr9 | 98209190  | 98209192  | 2   | 100 | 100 | 100 |
| PTCH1 | chr9 | 98209193  | 98209735  | 542 | 100 | 93  | 100 |
| PTCH1 | chr9 | 98211348  | 98211607  | 259 | 100 | 100 | 100 |
| PTCH1 | chr9 | 98212120  | 98212224  | 104 | 100 | 100 | 100 |
| PTCH1 | chr9 | 98215757  | 98215904  | 147 | 100 | 100 | 100 |
| PTCH1 | chr9 | 98218555  | 98218697  | 142 | 100 | 100 | 100 |
| PTCH1 | chr9 | 98220292  | 98220577  | 285 | 100 | 100 | 100 |
| PTCH1 | chr9 | 98221879  | 98222067  | 188 | 100 | 100 | 100 |
| PTCH1 | chr9 | 98224135  | 98224282  | 147 | 100 | 100 | 100 |
| PTCH1 | chr9 | 98229395  | 98229709  | 314 | 100 | 100 | 100 |
| PTCH1 | chr9 | 98231030  | 98231437  | 407 | 100 | 100 | 100 |
| PTCH1 | chr9 | 98232092  | 98232215  | 123 | 100 | 100 | 100 |
| PTCH1 | chr9 | 98238313  | 98238443  | 130 | 100 | 99  | 100 |
| PTCH1 | chr9 | 98239038  | 98239141  | 103 | 100 | 100 | 100 |
| PTCH1 | chr9 | 98239826  | 98239986  | 160 | 100 | 100 | 100 |
| PTCH1 | chr9 | 98240334  | 98240470  | 136 | 100 | 100 | 100 |
| PTCH1 | chr9 | 98241279  | 98241431  | 152 | 100 | 100 | 100 |
| PTCH1 | chr9 | 98242248  | 98242374  | 126 | 100 | 100 | 100 |
| PTCH1 | chr9 | 98242669  | 98242872  | 203 | 100 | 100 | 100 |
| PTCH1 | chr9 | 98244228  | 98244324  | 96  | 100 | 100 | 100 |
| PTCH1 | chr9 | 98244413  | 98244487  | 74  | 100 | 100 | 100 |
| PTCH1 | chr9 | 98247964  | 98248158  | 194 | 100 | 100 | 100 |
| PTCH1 | chr9 | 98268686  | 98268883  | 197 | 100 | 100 | 100 |
| PTCH1 | chr9 | 98269216  | 98269218  | 2   | 100 | 100 | 100 |
| PTCH1 | chr9 | 98269508  | 98269510  | 2   | 100 | 100 | 100 |
| PTCH1 | chr9 | 98270213  | 98270215  | 2   | 100 | 100 | 100 |
| PTCH1 | chr9 | 98270230  | 98270232  | 2   | 100 | 100 | 100 |
| PTCH1 | chr9 | 98270440  | 98270643  | 203 | 70  | 41  | 100 |
| PTCH1 | chr9 | 98278748  | 98278753  | 5   | 100 | 100 | 100 |
| PTCH1 | chr9 | 98278902  | 98279102  | 200 | 100 | 100 | 100 |
| RARB  | chr3 | 24870894  | 24870896  | 2   | 0   | 0   | 0   |
| RARB  | chr3 | 24900162  | 24900164  | 2   | 0   | 0   | 0   |
| RARB  | chr3 | 24900243  | 24900245  | 2   | 0   | 0   | 0   |
| RARB  | chr3 | 25101613  | 25101615  | 2   | 0   | 0   | 0   |
| RARB  | chr3 | 25101667  | 25101669  | 2   | 0   | 0   | 0   |
| RARB  | chr3 | 25215607  | 25215609  | 2   | 100 | 100 | 100 |
| RARB  | chr3 | 25215888  | 25216068  | 180 | 100 | 100 | 100 |
| RARB  | chr3 | 25382354  | 25382384  | 30  | 100 | 100 | 100 |
| RARB  | chr3 | 25470012  | 25470024  | 12  | 100 | 100 | 100 |

|        |       |           |           |      |     |     |     |
|--------|-------|-----------|-----------|------|-----|-----|-----|
| RARB   | chr3  | 25470222  | 25470381  | 159  | 100 | 100 | 100 |
| RARB   | chr3  | 25499884  | 25499886  | 2    | 100 | 100 | 100 |
| RARB   | chr3  | 25502681  | 25502834  | 153  | 100 | 100 | 100 |
| RARB   | chr3  | 25542670  | 25542816  | 146  | 100 | 100 | 100 |
| RARB   | chr3  | 25611246  | 25611411  | 165  | 100 | 100 | 100 |
| RARB   | chr3  | 25622034  | 25622215  | 181  | 100 | 100 | 100 |
| RARB   | chr3  | 25634991  | 25635200  | 209  | 100 | 100 | 100 |
| RARB   | chr3  | 25636008  | 25636171  | 163  | 100 | 100 | 100 |
| RARB   | chr3  | 25637908  | 25638107  | 199  | 100 | 100 | 100 |
| RAX    | chr18 | 56936235  | 56936735  | 500  | 69  | 7   | 100 |
| RAX    | chr18 | 56939590  | 56939848  | 258  | 98  | 83  | 100 |
| RAX    | chr18 | 56940147  | 56940438  | 291  | 74  | 0   | 100 |
| SALL2  | chr14 | 21990141  | 21990380  | 239  | 100 | 100 | 100 |
| SALL2  | chr14 | 21990837  | 21993790  | 2953 | 100 | 100 | 100 |
| SALL2  | chr14 | 21994192  | 21994261  | 69   | 96  | 0   | 100 |
| SALL2  | chr14 | 22004980  | 22005055  | 75   | 100 | 100 | 100 |
| SEMA3E | chr7  | 82996901  | 82997356  | 455  | 100 | 100 | 100 |
| SEMA3E | chr7  | 83014607  | 83014751  | 144  | 100 | 100 | 100 |
| SEMA3E | chr7  | 83016296  | 83016368  | 72   | 100 | 99  | 100 |
| SEMA3E | chr7  | 83021868  | 83022039  | 171  | 100 | 100 | 100 |
| SEMA3E | chr7  | 83023610  | 83023656  | 46   | 100 | 100 | 100 |
| SEMA3E | chr7  | 83025951  | 83026047  | 96   | 100 | 99  | 100 |
| SEMA3E | chr7  | 83029341  | 83029568  | 227  | 100 | 100 | 100 |
| SEMA3E | chr7  | 83031945  | 83032094  | 149  | 100 | 99  | 100 |
| SEMA3E | chr7  | 83034763  | 83034837  | 74   | 100 | 99  | 100 |
| SEMA3E | chr7  | 83035258  | 83035377  | 119  | 100 | 99  | 100 |
| SEMA3E | chr7  | 83036410  | 83036557  | 147  | 100 | 99  | 100 |
| SEMA3E | chr7  | 83037681  | 83037805  | 124  | 100 | 98  | 100 |
| SEMA3E | chr7  | 83047703  | 83047801  | 98   | 100 | 100 | 100 |
| SEMA3E | chr7  | 83095795  | 83095919  | 124  | 100 | 100 | 100 |
| SEMA3E | chr7  | 83098556  | 83098620  | 64   | 100 | 100 | 100 |
| SEMA3E | chr7  | 83119427  | 83119592  | 165  | 100 | 72  | 100 |
| SEMA3E | chr7  | 83270645  | 83270647  | 2    | 100 | 100 | 100 |
| SEMA3E | chr7  | 83277741  | 83277858  | 117  | 100 | 98  | 100 |
| SHH    | chr7  | 155592700 | 155592941 | 241  | 0   | 0   | 0   |
| SHH    | chr7  | 155595593 | 155596422 | 829  | 63  | 0   | 100 |
| SHH    | chr7  | 155598987 | 155599253 | 266  | 100 | 100 | 100 |
| SHH    | chr7  | 155599402 | 155599443 | 41   | 97  | 0   | 100 |
| SHH    | chr7  | 155599533 | 155599535 | 2    | 93  | 0   | 100 |
| SHH    | chr7  | 155601684 | 155601686 | 2    | 0   | 0   | 0   |
| SHH    | chr7  | 155604514 | 155604816 | 302  | 100 | 100 | 100 |

|        |       |           |           |     |     |     |     |
|--------|-------|-----------|-----------|-----|-----|-----|-----|
| SIX3   | chr2  | 45169243  | 45170051  | 808 | 93  | 51  | 100 |
| SIX3   | chr2  | 45171704  | 45171899  | 195 | 88  | 54  | 100 |
| SMOC1  | chr14 | 70346395  | 70346496  | 101 | 91  | 0   | 100 |
| SMOC1  | chr14 | 70418852  | 70419022  | 170 | 100 | 100 | 100 |
| SMOC1  | chr14 | 70420134  | 70420251  | 117 | 100 | 100 | 100 |
| SMOC1  | chr14 | 70442429  | 70442533  | 104 | 100 | 100 | 100 |
| SMOC1  | chr14 | 70444632  | 70444684  | 52  | 100 | 100 | 100 |
| SMOC1  | chr14 | 70459131  | 70459192  | 61  | 100 | 100 | 100 |
| SMOC1  | chr14 | 70461114  | 70461199  | 85  | 100 | 100 | 100 |
| SMOC1  | chr14 | 70477468  | 70477665  | 197 | 100 | 100 | 100 |
| SMOC1  | chr14 | 70478199  | 70478286  | 87  | 100 | 100 | 100 |
| SMOC1  | chr14 | 70480100  | 70480210  | 110 | 100 | 100 | 100 |
| SMOC1  | chr14 | 70489917  | 70490166  | 249 | 100 | 100 | 100 |
| SMOC1  | chr14 | 70496956  | 70496975  | 19  | 100 | 100 | 100 |
| SOX2   | chr3  | 181430146 | 181431104 | 958 | 97  | 72  | 100 |
| SRD5A3 | chr4  | 56212503  | 56212726  | 223 | 80  | 0   | 100 |
| SRD5A3 | chr4  | 56225510  | 56225657  | 147 | 100 | 100 | 100 |
| SRD5A3 | chr4  | 56230238  | 56230440  | 202 | 100 | 100 | 100 |
| SRD5A3 | chr4  | 56233752  | 56233891  | 139 | 100 | 100 | 100 |
| SRD5A3 | chr4  | 56235996  | 56236258  | 262 | 100 | 100 | 100 |
| STRA6  | chr15 | 74472420  | 74472586  | 166 | 100 | 100 | 100 |
| STRA6  | chr15 | 74473120  | 74473280  | 160 | 100 | 100 | 100 |
| STRA6  | chr15 | 74473633  | 74473801  | 168 | 100 | 100 | 100 |
| STRA6  | chr15 | 74474499  | 74474605  | 106 | 100 | 100 | 100 |
| STRA6  | chr15 | 74474681  | 74474803  | 122 | 100 | 100 | 100 |
| STRA6  | chr15 | 74476194  | 74476332  | 138 | 100 | 100 | 100 |
| STRA6  | chr15 | 74477318  | 74477398  | 80  | 100 | 100 | 100 |
| STRA6  | chr15 | 74481453  | 74481620  | 167 | 100 | 100 | 100 |
| STRA6  | chr15 | 74483178  | 74483244  | 66  | 100 | 100 | 100 |
| STRA6  | chr15 | 74483505  | 74483586  | 81  | 100 | 100 | 100 |
| STRA6  | chr15 | 74483762  | 74483834  | 72  | 100 | 100 | 100 |
| STRA6  | chr15 | 74486138  | 74486265  | 127 | 100 | 100 | 100 |
| STRA6  | chr15 | 74487640  | 74487811  | 171 | 100 | 100 | 100 |
| STRA6  | chr15 | 74487942  | 74488018  | 76  | 100 | 100 | 100 |
| STRA6  | chr15 | 74488346  | 74488490  | 144 | 100 | 100 | 100 |
| STRA6  | chr15 | 74489676  | 74489766  | 90  | 100 | 99  | 100 |
| STRA6  | chr15 | 74490090  | 74490161  | 71  | 100 | 100 | 100 |
| STRA6  | chr15 | 74494493  | 74494625  | 132 | 100 | 100 | 100 |
| STRA6  | chr15 | 74494756  | 74494860  | 104 | 100 | 100 | 100 |
| STRA6  | chr15 | 74495051  | 74495053  | 2   | 100 | 100 | 100 |
| STRA6  | chr15 | 74495341  | 74495343  | 2   | 100 | 100 | 100 |

|        |       |          |          |     |     |     |     |
|--------|-------|----------|----------|-----|-----|-----|-----|
| STRA6  | chr15 | 74500035 | 74500067 | 32  | 100 | 100 | 100 |
| STRA6  | chr15 | 74501138 | 74501140 | 2   | 100 | 100 | 100 |
| STRA6  | chr15 | 74501697 | 74501795 | 98  | 100 | 100 | 100 |
| TFAP2A | chr6  | 10398649 | 10398940 | 291 | 100 | 100 | 100 |
| TFAP2A | chr6  | 10400678 | 10400824 | 146 | 100 | 100 | 100 |
| TFAP2A | chr6  | 10402722 | 10402845 | 123 | 100 | 100 | 100 |
| TFAP2A | chr6  | 10404738 | 10404974 | 236 | 100 | 100 | 100 |
| TFAP2A | chr6  | 10407023 | 10407079 | 56  | 100 | 100 | 100 |
| TFAP2A | chr6  | 10410131 | 10410570 | 439 | 100 | 88  | 100 |
| TFAP2A | chr6  | 10411800 | 10411829 | 29  | 100 | 100 | 100 |
| TFAP2A | chr6  | 10415171 | 10415218 | 47  | 100 | 100 | 100 |
| TFAP2A | chr6  | 10419648 | 10419683 | 35  | 100 | 100 | 100 |
| TMEM67 | chr8  | 94767137 | 94767139 | 2   | 100 | 100 | 100 |
| TMEM67 | chr8  | 94767142 | 94767367 | 225 | 100 | 100 | 100 |
| TMEM67 | chr8  | 94768003 | 94768096 | 93  | 100 | 98  | 100 |
| TMEM67 | chr8  | 94770708 | 94770806 | 98  | 100 | 100 | 100 |
| TMEM67 | chr8  | 94772085 | 94772223 | 138 | 100 | 95  | 100 |
| TMEM67 | chr8  | 94776067 | 94776171 | 104 | 100 | 100 | 100 |
| TMEM67 | chr8  | 94777631 | 94777705 | 74  | 100 | 99  | 100 |
| TMEM67 | chr8  | 94777797 | 94777876 | 79  | 100 | 100 | 100 |
| TMEM67 | chr8  | 94784814 | 94784881 | 67  | 100 | 99  | 100 |
| TMEM67 | chr8  | 94792818 | 94792977 | 159 | 100 | 100 | 100 |
| TMEM67 | chr8  | 94793099 | 94793212 | 113 | 100 | 73  | 100 |
| TMEM67 | chr8  | 94793883 | 94793974 | 91  | 100 | 100 | 100 |
| TMEM67 | chr8  | 94794620 | 94794690 | 70  | 100 | 100 | 100 |
| TMEM67 | chr8  | 94797447 | 94797608 | 161 | 100 | 100 | 100 |
| TMEM67 | chr8  | 94798448 | 94798576 | 128 | 100 | 100 | 100 |
| TMEM67 | chr8  | 94800069 | 94800179 | 110 | 100 | 100 | 100 |
| TMEM67 | chr8  | 94803488 | 94803549 | 61  | 100 | 64  | 100 |
| TMEM67 | chr8  | 94805423 | 94805526 | 103 | 100 | 100 | 100 |
| TMEM67 | chr8  | 94807634 | 94807737 | 103 | 100 | 100 | 100 |
| TMEM67 | chr8  | 94808126 | 94808217 | 91  | 100 | 99  | 100 |
| TMEM67 | chr8  | 94809359 | 94809463 | 104 | 100 | 100 | 100 |
| TMEM67 | chr8  | 94809556 | 94809700 | 144 | 100 | 100 | 100 |
| TMEM67 | chr8  | 94811843 | 94811988 | 145 | 100 | 100 | 100 |
| TMEM67 | chr8  | 94815829 | 94815914 | 85  | 100 | 100 | 100 |
| TMEM67 | chr8  | 94816987 | 94817108 | 121 | 100 | 100 | 100 |
| TMEM67 | chr8  | 94821065 | 94821186 | 121 | 100 | 100 | 100 |
| TMEM67 | chr8  | 94821282 | 94821391 | 109 | 100 | 72  | 100 |
| TMEM67 | chr8  | 94822010 | 94822117 | 107 | 100 | 100 | 100 |
| TMEM67 | chr8  | 94827530 | 94827677 | 147 | 100 | 100 | 100 |



|        |       |           |           |     |     |     |     |
|--------|-------|-----------|-----------|-----|-----|-----|-----|
| TMEM67 | chr8  | 94828597  | 94828680  | 83  | 100 | 100 | 100 |
| VSX2   | chr14 | 74706264  | 74706636  | 372 | 91  | 38  | 100 |
| VSX2   | chr14 | 74707882  | 74707971  | 89  | 100 | 100 | 100 |
| VSX2   | chr14 | 74711865  | 74711993  | 128 | 100 | 100 | 100 |
| VSX2   | chr14 | 74726302  | 74726487  | 185 | 100 | 100 | 100 |
| VSX2   | chr14 | 74727294  | 74727622  | 328 | 100 | 100 | 100 |
| YAP1   | chr11 | 101981579 | 101981902 | 323 | 71  | 0   | 100 |
| YAP1   | chr11 | 101983476 | 101983478 | 2   | 100 | 100 | 100 |
| YAP1   | chr11 | 101984872 | 101985127 | 255 | 100 | 100 | 100 |
| YAP1   | chr11 | 102033184 | 102033304 | 120 | 100 | 100 | 100 |
| YAP1   | chr11 | 102056746 | 102056864 | 118 | 100 | 99  | 100 |
| YAP1   | chr11 | 102076621 | 102076819 | 198 | 100 | 100 | 100 |
| YAP1   | chr11 | 102080245 | 102080297 | 52  | 100 | 100 | 100 |
| YAP1   | chr11 | 102094350 | 102094485 | 135 | 100 | 100 | 100 |
| YAP1   | chr11 | 102098197 | 102098314 | 117 | 100 | 100 | 100 |
| YAP1   | chr11 | 102100430 | 102100671 | 241 | 100 | 100 | 100 |

**Supp. Table S1: (a) List of genes included in custom capture (CC-1 and/or CC-2) high-throughput sequencing.** Genes in bold are human coloboma-associated genes. **(b) Exon-wise coverage for each coloboma-associated gene included in the sequencing panel.** The “Start” and “End” numbers represent the coordinates for each exon in the gene. The data is showed as average, minimum and maximum coverage generated from the sequencing data for all the subjects included in the panel.





|                           |     |                                                   |     |
|---------------------------|-----|---------------------------------------------------|-----|
| XP_003433175.1_retinoic_a | 451 | ----SPLVQ-----                                    | 455 |
| XP_003415774.1_retinoic_a | 444 | ----SPRVQ-----                                    | 448 |
| NP_990657.1_retinoic_acid | 451 | ----SPMVQ-----                                    | 455 |
| XP_002932450.2_PREDICTED: | 443 | ----CAQVQ-----                                    | 447 |
| NP_571414.1_retinoic_acid | 452 | GSEPSPEEEDDDDEDEGEEERGTDSDGEAWGGQEPNADVSRKSHGGRAQ | 499 |
| tr_S4RRL8_S4RRL8_PETMA_Re | 241 | ----APHGKG-----                                   | 246 |
| <u>Consensus_aa:</u>      |     | ....tP..p.....                                    |     |
| <u>Consensus_ss:</u>      |     |                                                   |     |

**PROMAL3D Alignment parameters for RARB protein sequences of different vertebrate species:**

Alignment parameters:

Identity threshold above which fast alignment is applied: **0.6**

Weight for constraints derived from sequences: **1**

Weight for constraints derived from homologs with structures: **1.5**

Weight for constraints derived from input structures: **1.5**

Parameters for profile-profile comparison:

Weight for amino acid scores: **0.8**

Weight for predicted secondary structure scores: **0.2**

Parameters for deriving sequence profiles from PSI-BLAST searches:

PSI-BLAST iteration number: **3**

PSI-BLAST e-value inclusion threshold: **0.001**

Identity cutoff below which distant homologs are removed: **0.25**

Maximum number of homologs kept for PSI-BLAST alignment: **300**

Parameters for detecting and using homologs with 3D structures (homolog3d):

PSI-BLAST e-value cutoff against structural database: **0.001**

Identity cutoff below which 3D structures are not used: **0.2**

Align homologs with 3D structures by programs: **dali - not used; fast - used; talign - used**

Realign target-homolog3d using profile-profile alignment: **yes**

Parameters for pairwise alignments between input 3D structures:

Align input structures by programs: **dali - not used; fast - used; talign - used**

Parameters for aligning sequences within groups in the first alignment stage:

Align sequences within groups in the first alignment stage by: **mafft**

**Supp. Table S2: RARB protein conservation across vertebrate species (PROMALS3D Alignment).** The location of specific domains in the protein are indicated as “Start” and “End”, and the different vertebrate species included are listed. The alignment parameters are listed at the end of the document.

**Supp. Table\_S3. *rarga* morpholino injections and human *RARB* mRNA rescue experiments**

| Type of Injection                          | No Col /<br>Grade 1 | Mild Col /<br>Grade 2 | Severe Col /<br>Grade 3 | Total Emb<br>Injected |
|--------------------------------------------|---------------------|-----------------------|-------------------------|-----------------------|
|                                            | No. of Emb (%)      | No. of Emb (%)        | No. of Emb (%)          |                       |
| <i>rarga</i> MO                            | 61 (35)             | 55 (31)               | 60 (34)                 | 176                   |
| <i>rarga</i> MO + <i>RARB</i> mRNA         | 81 (61)             | 26 (20)               | 26 (19)                 | 133                   |
| <i>rarga</i> MO + <i>RARB</i> -Mutant mRNA | 65 (44)             | 33 (22)               | 49 (33)                 | 147                   |
| <i>RARB</i> mRNA                           | 174 (100)           | 0 (0)                 | 0 (0)                   | 174                   |
| <i>RARB</i> -Mutant mRNA                   | 174 (100)           | 0 (0)                 | 0 (0)                   | 174                   |
| Std_C MO                                   | 199 (100)           | 0 (0)                 | 0 (0)                   | 199                   |
| Uninj Emb                                  | 288 (100)           | 0 (0)                 | 0 (0)                   | 288                   |

MO, Morpholino; Std\_C, Standard Control; Uninj, Uninjected; Emb, Embryos; Col, Coloboma

**Supp. Table S3: Zebrafish embryos injected with *rarga* SB MO and rescue experiments with human wild type *RARB* and *RARB*-mutant mRNA. MO injected at 7.5 ng/ $\mu$ l and mRNA injected at 150 pg/nl.**
